# Supplementary material for: Efficacy and Safety of Bempedoic Acid in Patients With Hypercholesterolemia: Systematic Review and Meta‐Analysis of Randomized Controlled Trials
Source: PubMed Central journal article supplement — J Am Heart Assoc. 2020 Jul 21;9(15):e016262. doi: 10.1161/JAHA.119.016262 (PMC7792250; doi:10.1161/jaha.119.016262), 2020-07-21

# **Supplemental Material**

**PubMed search**

| <b>Keywords</b>                                                                                                             | <b>Number of results</b> |
|-----------------------------------------------------------------------------------------------------------------------------|--------------------------|
| <b>(bempedoic acid OR ETC-1002)</b>                                                                                         | <b>54</b>                |
| <b>(bempedoic acid OR ETC-1002) AND (cholesterol)</b>                                                                       | <b>49</b>                |
| <b>(bempedoic acid OR ETC-1002) AND (cholesterol OR hypercholesterolemia)</b>                                               | <b>49</b>                |
| <b>(bempedoic acid OR ETC-1002) AND (cholesterol OR hypercholesterolemia OR hypercholesterolemic)</b>                       | <b>49</b>                |
| <b>(bempedoic acid OR ETC-1002) AND (cholesterol OR hypercholesterolemia OR hypercholesterolemic OR lipoprotein)</b>        | <b>50</b>                |
| <b>(bempedoic acid OR ETC-1002) AND (cholesterol OR hypercholesterolemia OR hypercholesterolemic OR lipoprotein OR LDL)</b> | <b>50</b>                |

**Table S1. Assessment of risk of bias in included studies.**

|                        |   |   |   |   |   |   |   |
|------------------------|---|---|---|---|---|---|---|
| <b>Ballantyne 2016</b> | ? | ? | ? | ? | + | + | - |
| <b>Ballantyne 2018</b> | + | + | + | + | + | + | + |
| <b>Ballantyne 2019</b> | ? | + | ? | + | + | + | + |
| <b>Goldberg 2019</b>   | + | + | + | ? | + | + | + |
| <b>Laufs 2019</b>      | ? | + | ? | + | + | + | - |
| <b>Ray 2019</b>        | ? | + | ? | + | + | + | + |
| <b>Thompson 2016</b>   | + | + | ? | + | + | + | + |

**Key**

 **Low risk of bias**

 **High risk of bias**

 **Unclear risk of bias**

*Random sequence generation*  
*Allocation concealment*  
*Blinding of participants and personnel*  
*Blinding of outcome assessment*  
*Incomplete outcome data*  
*Selective reporting*  
*Other bias*

**Table S2. Characteristics of included studies.**

| <b>Study</b>                                 | <b>Background lipid lowering therapy</b>     | <b>Baseline LDL-c cut-off</b>                                  |
|----------------------------------------------|----------------------------------------------|----------------------------------------------------------------|
| Ray 2019<br>Harmony <sup>26</sup>            | Maximally tolerated statin therapy±other LLT | ≥ 70 mg/dl                                                     |
| Goldberg 2019<br>Wisdom <sup>23</sup>        | Maximally tolerated statin therapy±other LLT | ≥ 100 mg/dl at screening or<br>≥ 70 mg/dl at randomization     |
| Ballantyne 2019 <sup>24</sup>                | Maximally tolerated statin therapy.          | ≥ 100 mg/dL for CAD/FH<br>≥130 mg/dL for multiple<br>VRFs      |
| Ballantyne 2016 <sup>29</sup>                | Maximally tolerated statin therapy           | 115-220 mg/dl                                                  |
| Thompson 2016 <sup>28</sup>                  | Maximally tolerated statin therapy           | 130-220 mg/dL                                                  |
| Ballantyne 2018<br>Tranquility <sup>27</sup> | No statin or low-dose statin                 | ≥ 100 mg/dL                                                    |
| Laufs 2019<br>Serenity <sup>25</sup>         | Maximally tolerated statin therapy           | ≥ 100 mg/dL for CAD/FH<br>≥130 mg/dL for primary<br>prevention |

\*LLT: lipid-lowering therapies

**Table S3. Meta-regression analyses. Impact of Age, male gender, body Mass Index (BMI), diabetes and baseline LDL-C on the difference in the incidence of adverse events, serious adverse events, drug discontinuation, muscle-related side effects and new-onset diabetes, gout flare and changes in uric acid between patients receiving bempedoic acid and control treatment group.**

| Outcome                     |         | Covariate |          |       |          |              |
|-----------------------------|---------|-----------|----------|-------|----------|--------------|
|                             |         | Age       | Male sex | BMI   | Diabetes | Baseline LDL |
| Adverse events              | z-value | 0.02      | -1.43    | 1.19  | 1.14     | 1.65         |
|                             | p-value | 0.983     | 0.151    | 0.233 | 0.251    | 0.098        |
| Serious adverse events      | z-value | 0.42      | 0.17     | 0.22  | -0.42    | 0.40         |
|                             | p-value | 0.677     | 0.860    | 0.824 | 0.670    | 0.690        |
| Drug discontinuation        | z-value | 1.92      | 1.43     | -1.30 | -1.31    | -0.99        |
|                             | p-value | 0.053     | 0.153    | 0.194 | 0.187    | 0.322        |
| Muscle-related side effects | z-value | 1.84      | 2.05     | -1.00 | -0.43    | -1.77        |
|                             | p-value | 0.065     | 0.041    | 0.315 | 0.663    | 0.077        |
| New-onset diabetes          | z-value | -1.02     | -0.50    | 1.21  | -0.19    | 0.98         |
|                             | p-value | 0.307     | 0.618    | 0.225 | 0.846    | 0.328        |
| Gout flare                  | z-value | 0.47      | 0.64     | -0.60 | 0.20     | -0.64        |
|                             | p-value | 0.635     | 0.518    | 0.547 | 0.842    | 0.522        |
| Uric acid                   | z-value | 3.40      | 0.70     | -0.95 | -0.29    | -0.31        |
|                             | p-value | <0.001    | 0.481    | 0.343 | 0.770    | 0.759        |

**Figure S1. PRISMA Flow Diagram.**

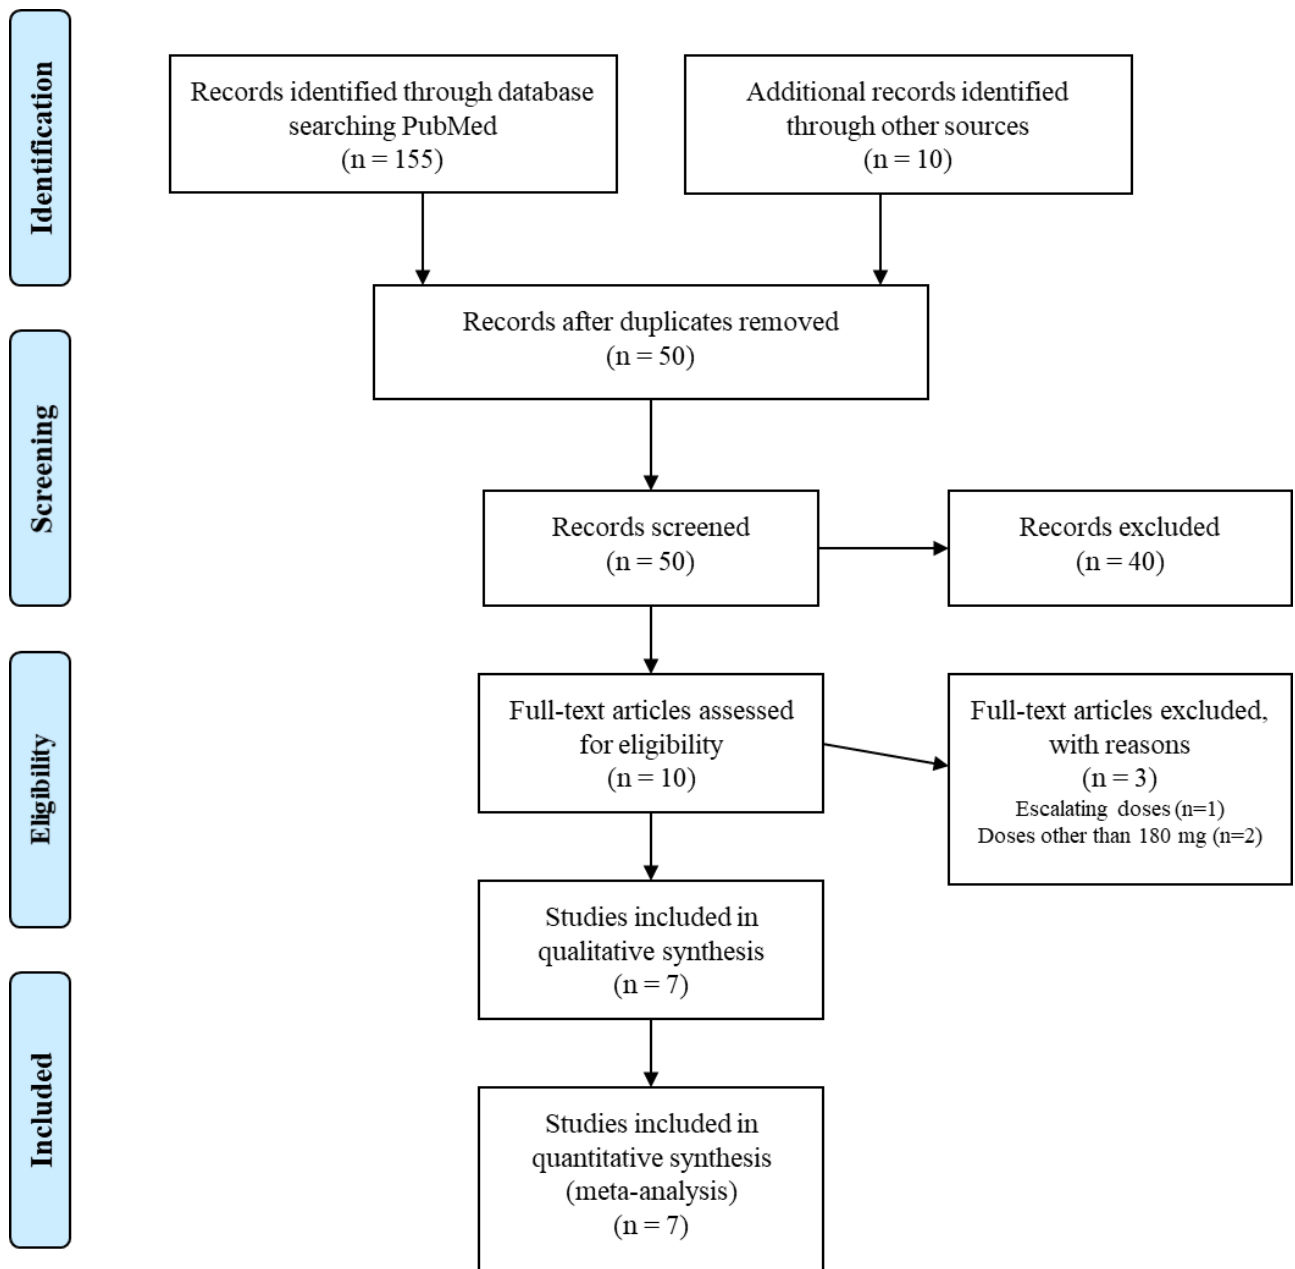

**Figure S2. Changes in high sensitivity C reactive protein (hsCRP) after 12 weeks of treatment with bempedoic acid as compared to control treatment.**

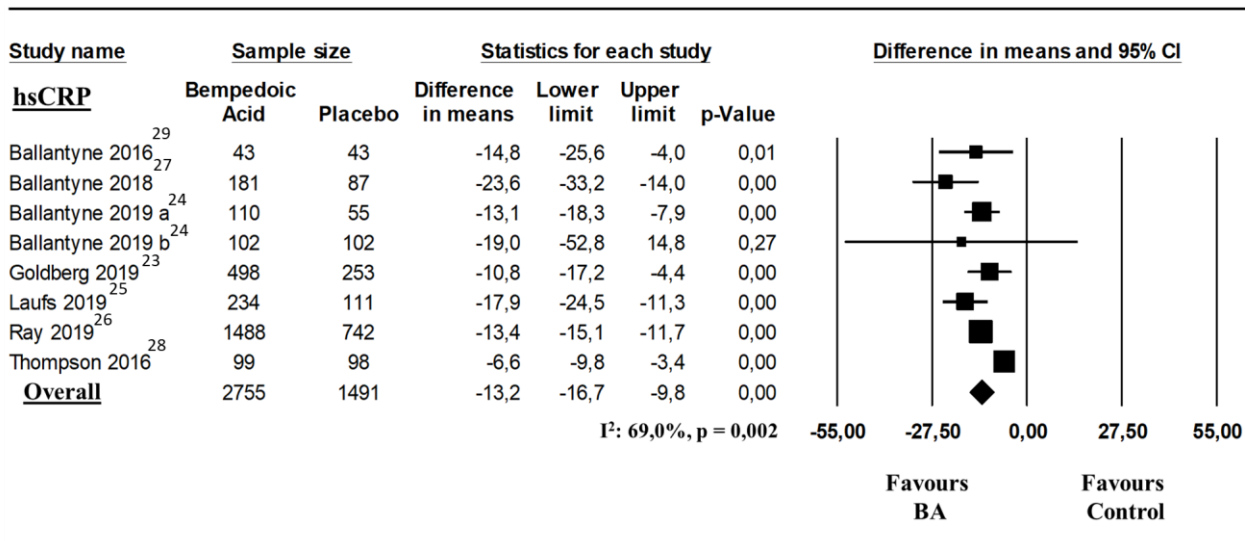

**Figure S3. Funnel plots of effect size versus standard error for studies evaluating the changes in total cholesterol (TC), low-density lipoprotein-cholesterol (LDL-C), non- high-density lipoprotein-cholesterol (non-HDL-C), Apolipoprotein B (Apo B) and high sensitivity C reactive protein (hsCRP) in subjects receiving bempedoic acid and in control treatment group.**

**Total cholesterol (TC)**

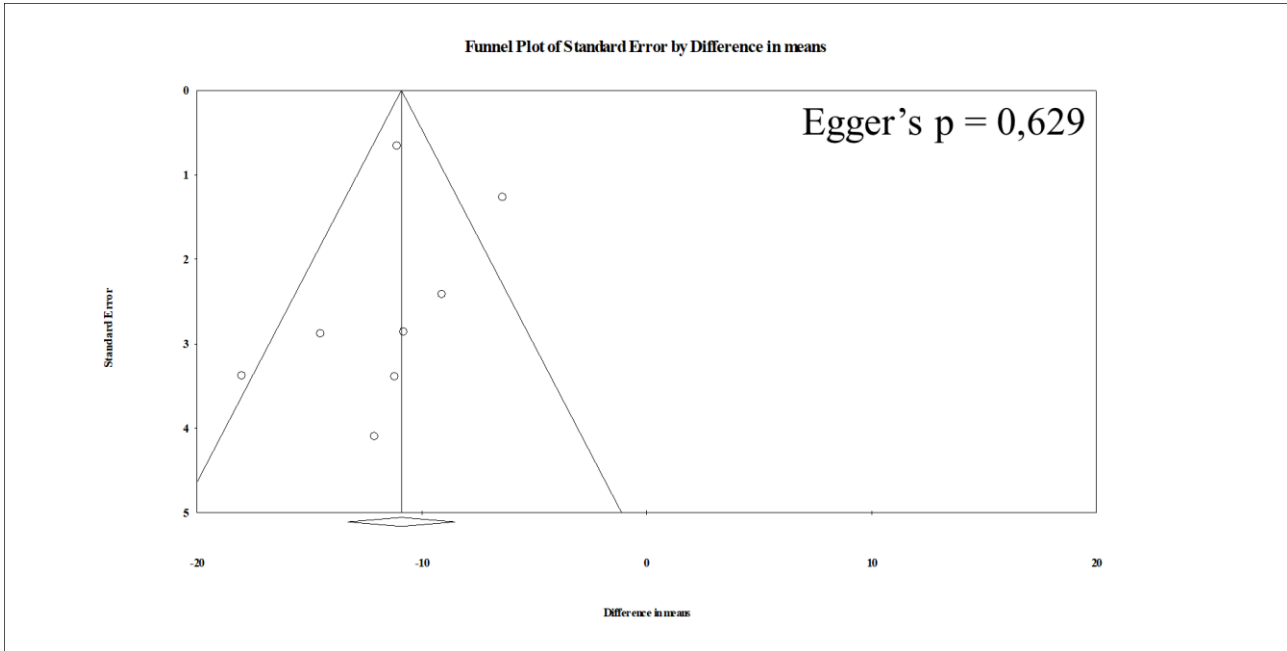

**Low-density lipoprotein-cholesterol (LDL-C)**

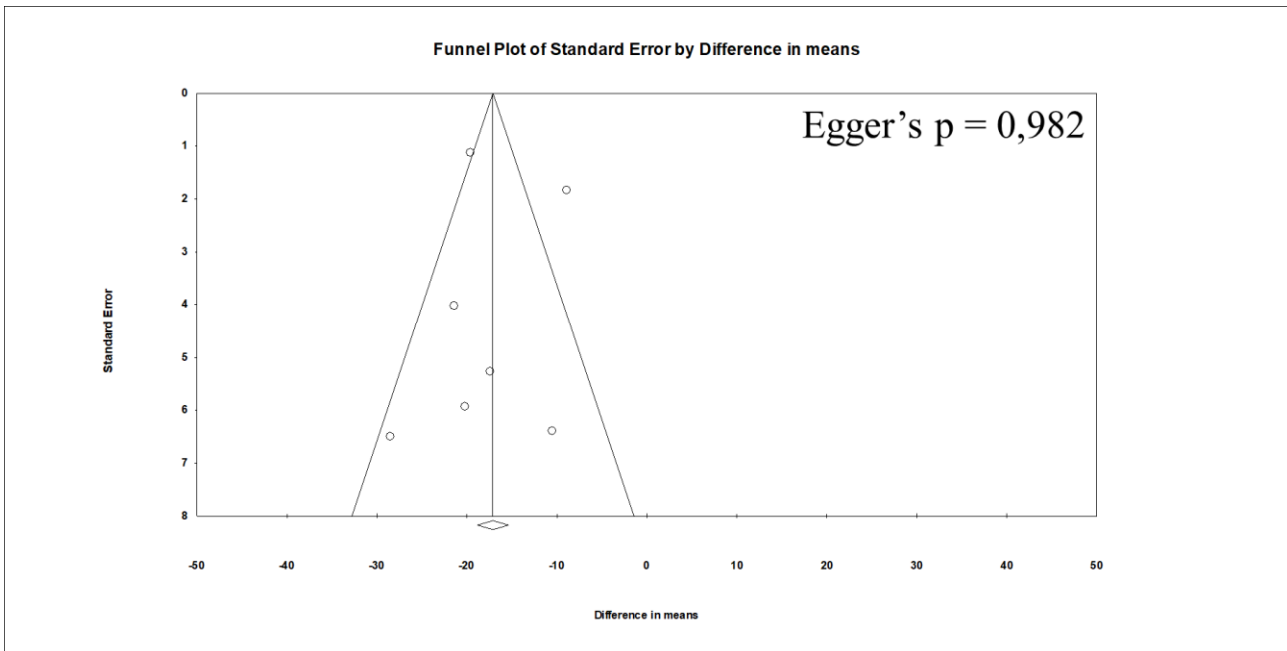

**Non-high-density lipoprotein-cholesterol (HDL-C)**



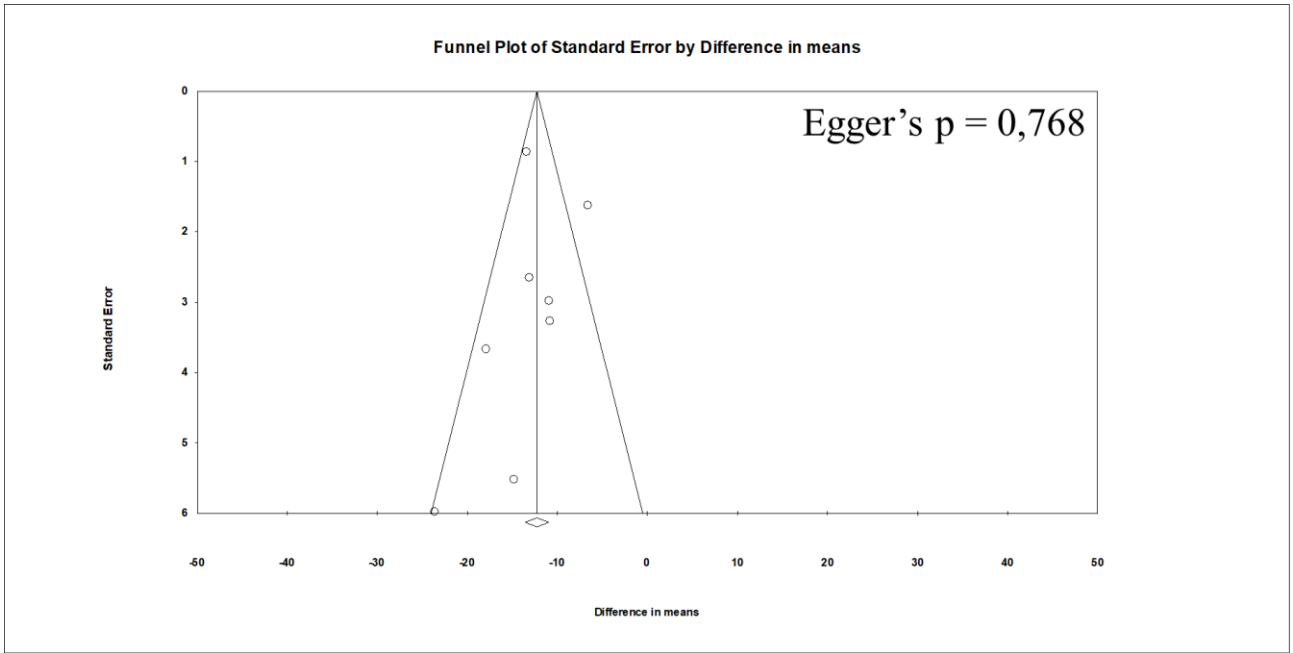

### Apolipoprotein B (Apo B)

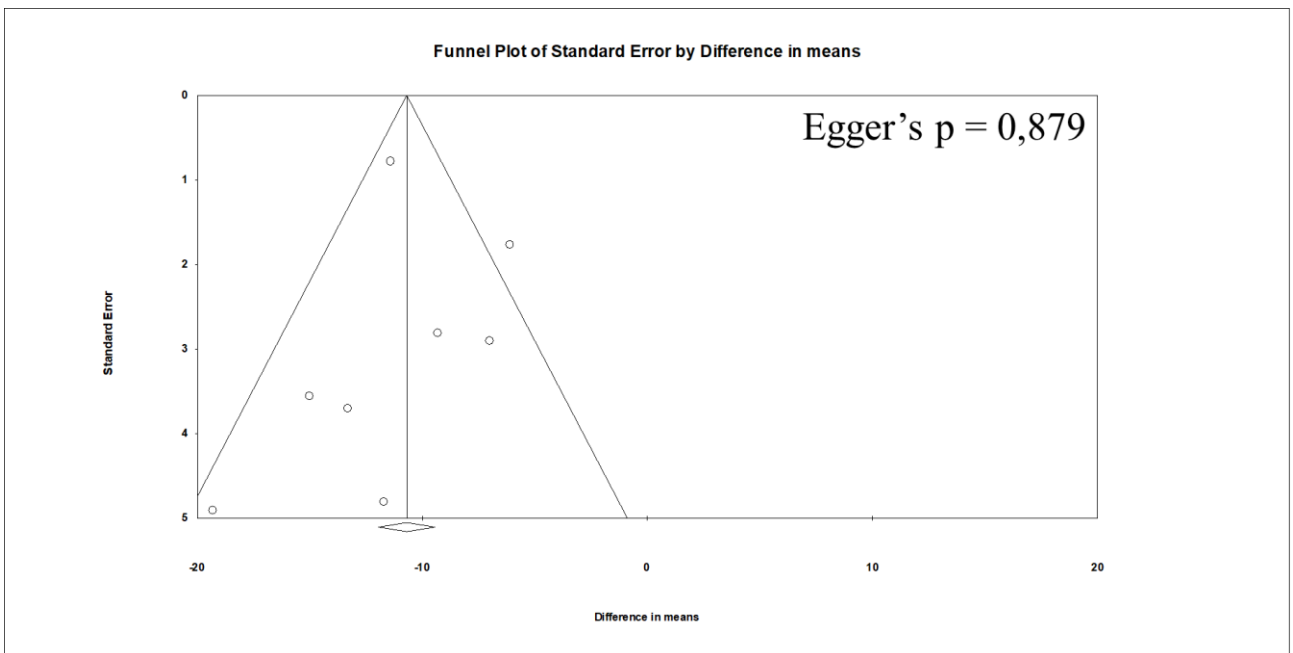

**High sensitivity C reactive protein (hsCRP)**

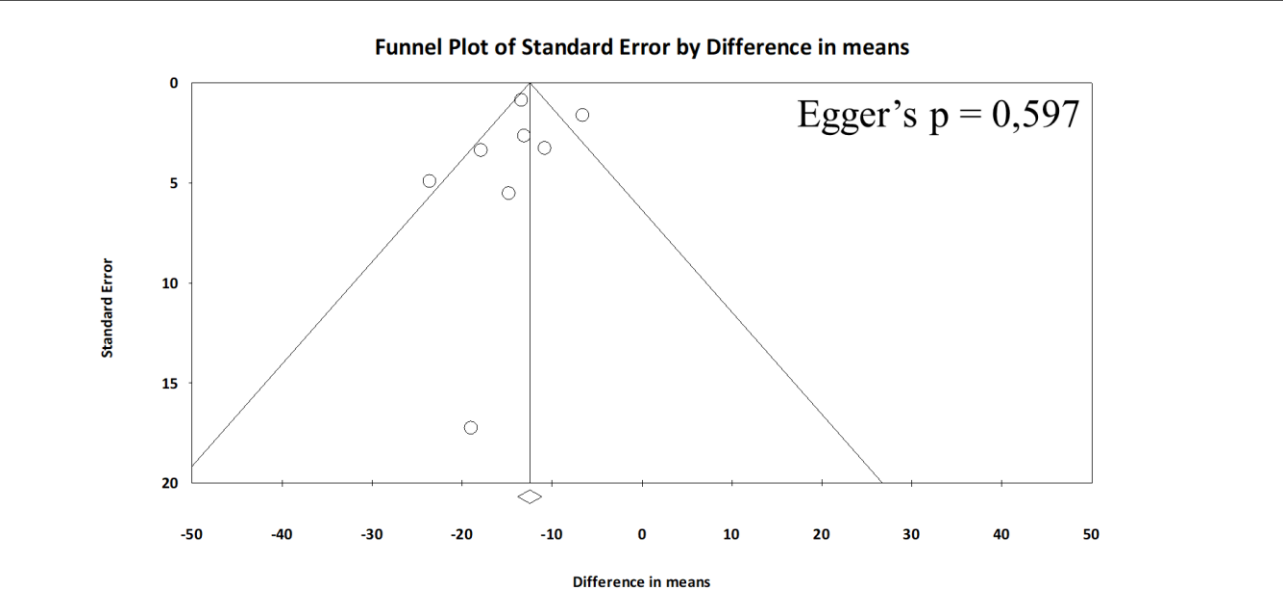

**Figure S4. Incidence of adverse events, serious adverse events, drug discontinuation, muscle-related side effects, new-onset diabetes, gout flare and changes in uric acid during treatment with bempedoic acid as compared to control treatment group.**

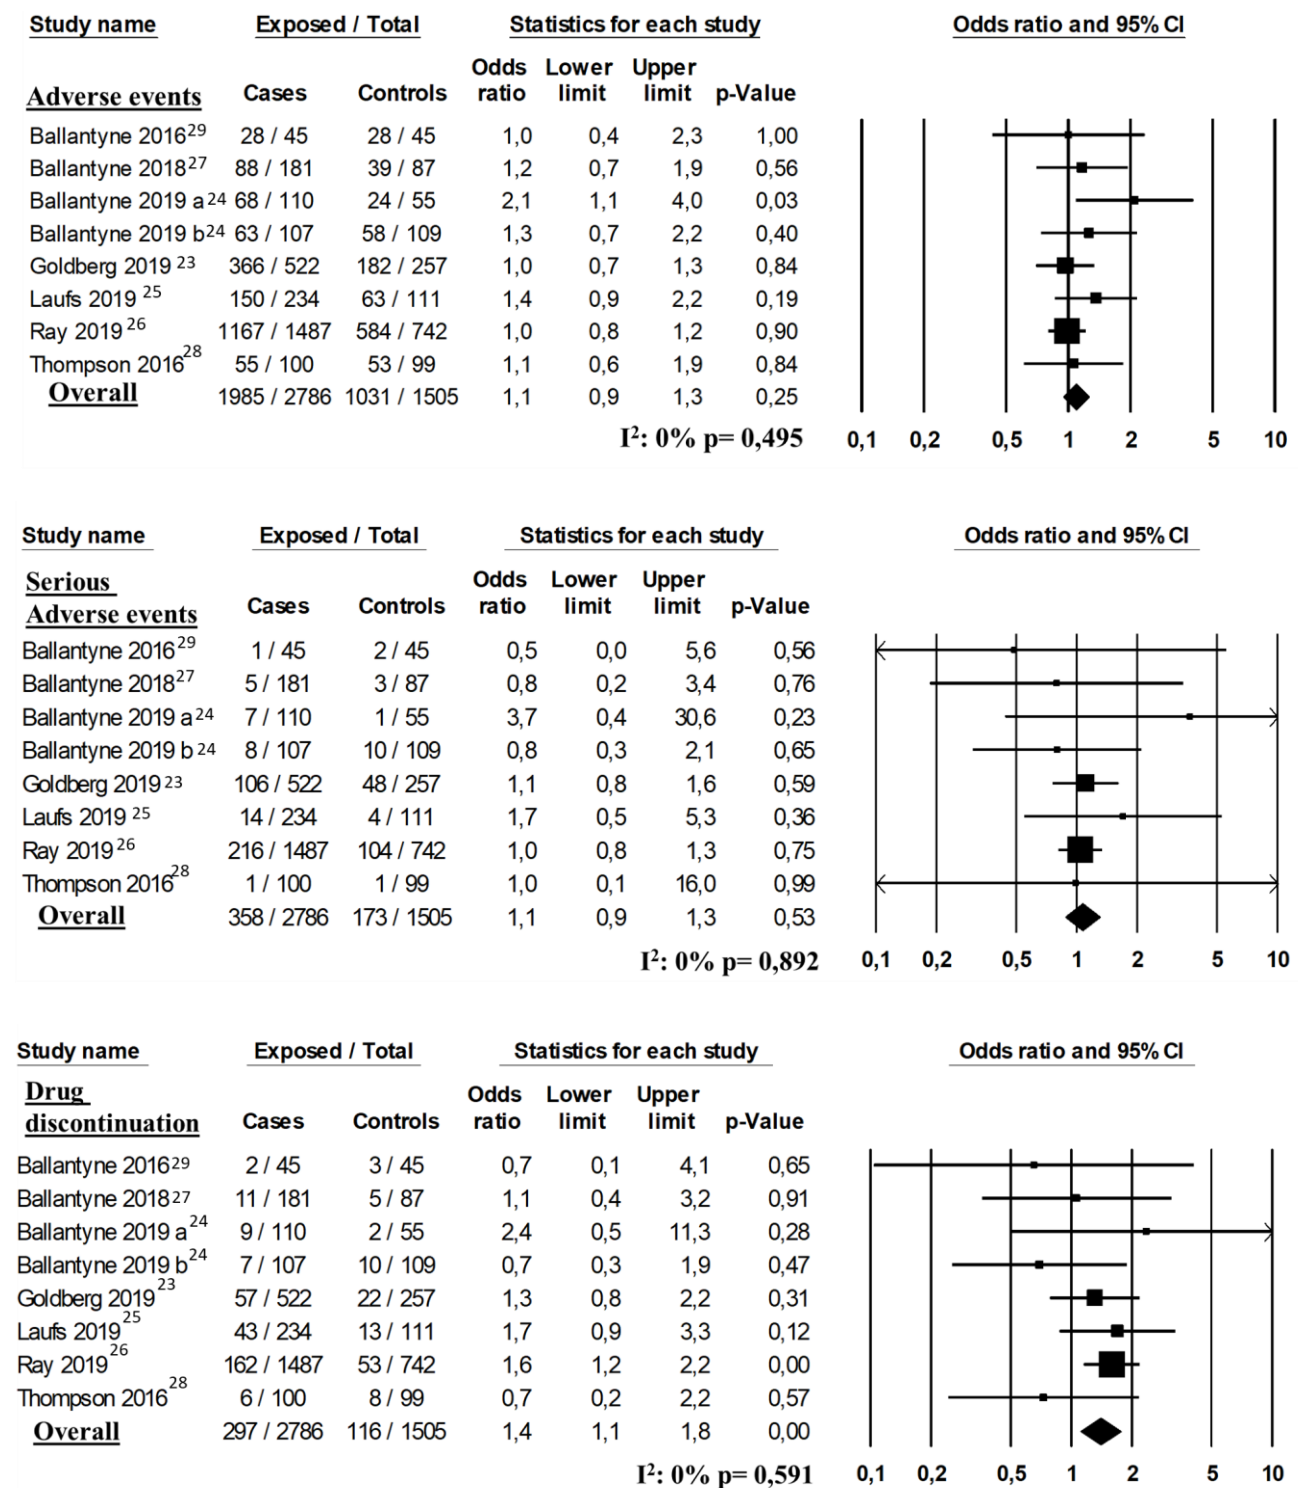

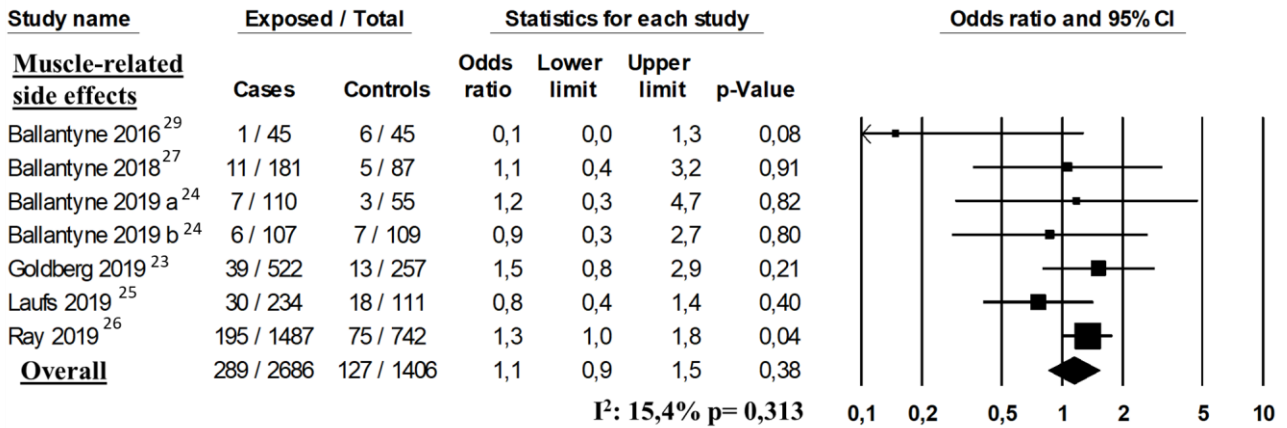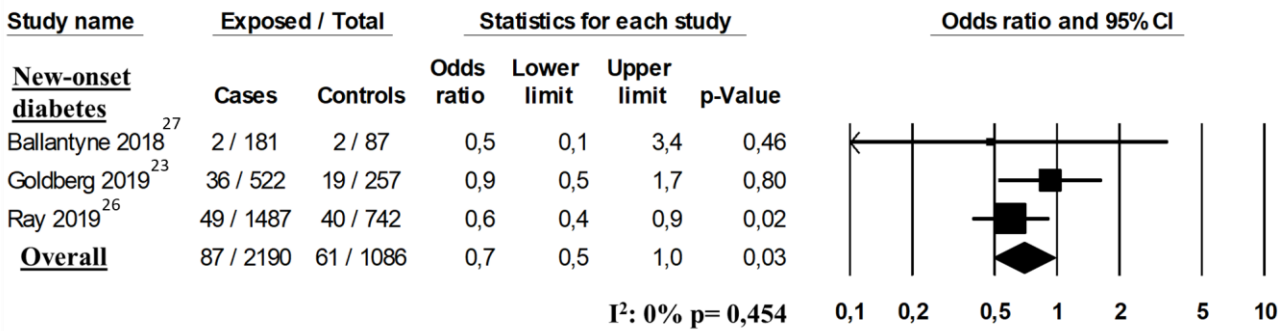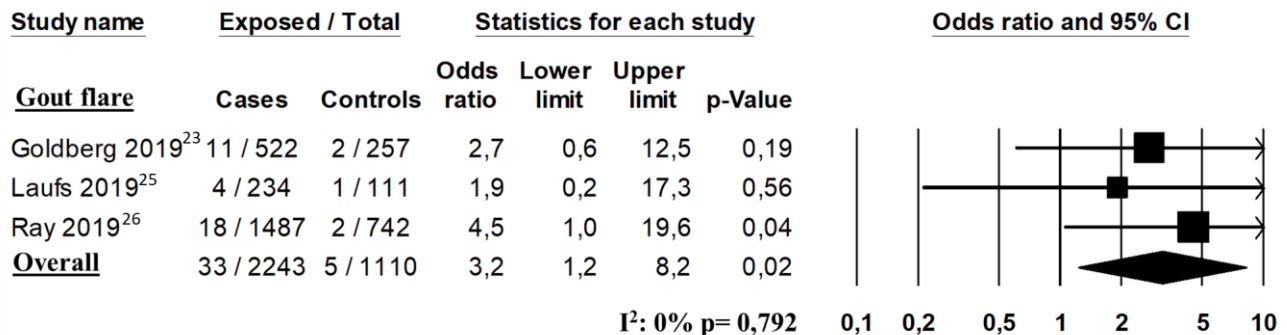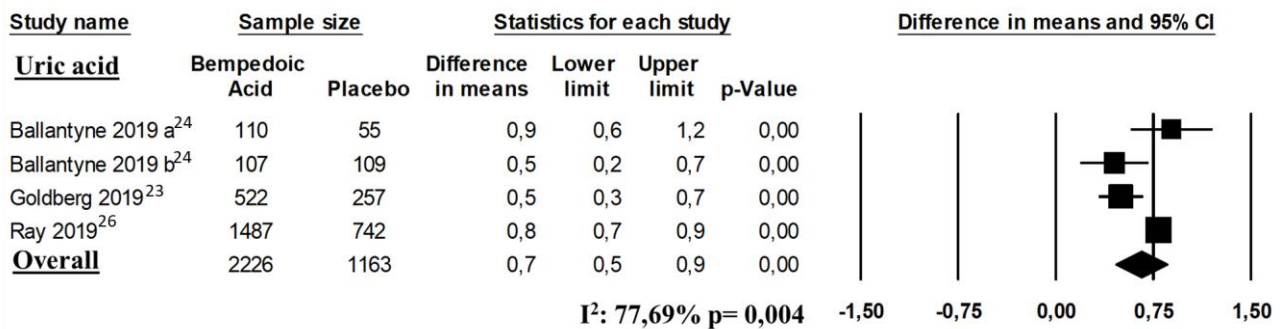

**Figure S5. Funnel plots of effect size versus standard error for studies evaluating the incidence of adverse events in subjects receiving bempedoic acid and in control treatment group (upper panel); adjustment of results by means of the Duval and Tweedie's trim and fill method (lower panel)**

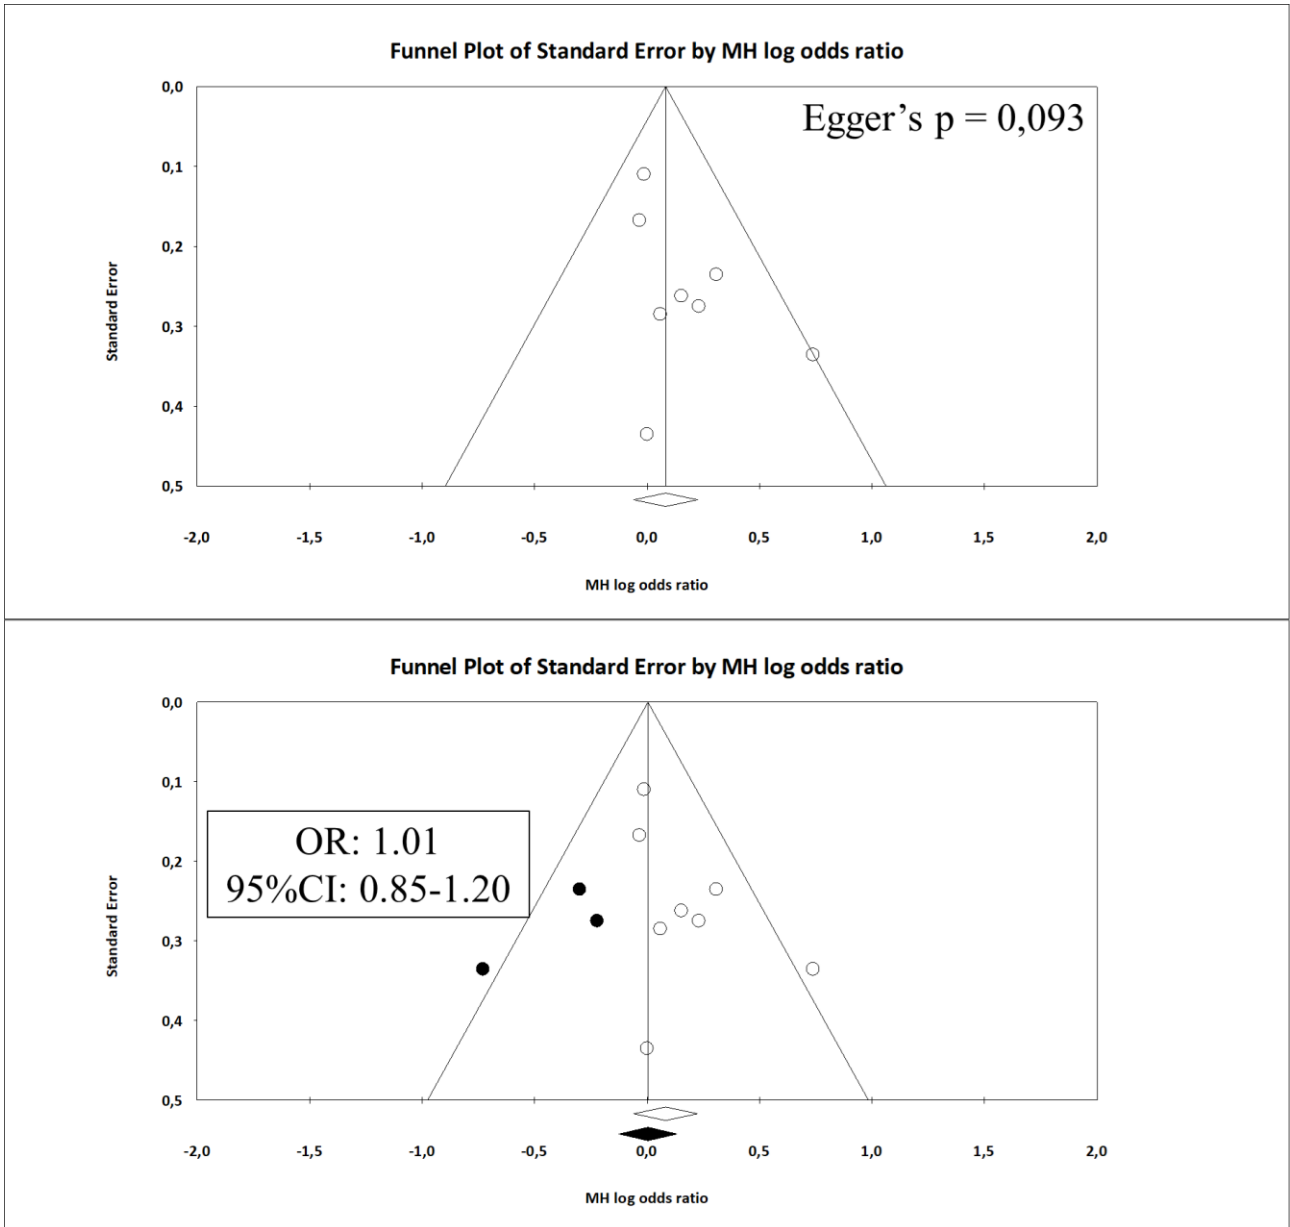

**Figure S6. Funnel plots of effect size versus standard error for studies evaluating the incidence of serious adverse events (Panel A), drug discontinuation (Panel B); muscle-related side effects (Panel C); new-onset diabetes (Panel D); gout flare (Panel E); changes in uric acid (Panel F) in subjects receiving bempedoic acid and in control treatment group.**

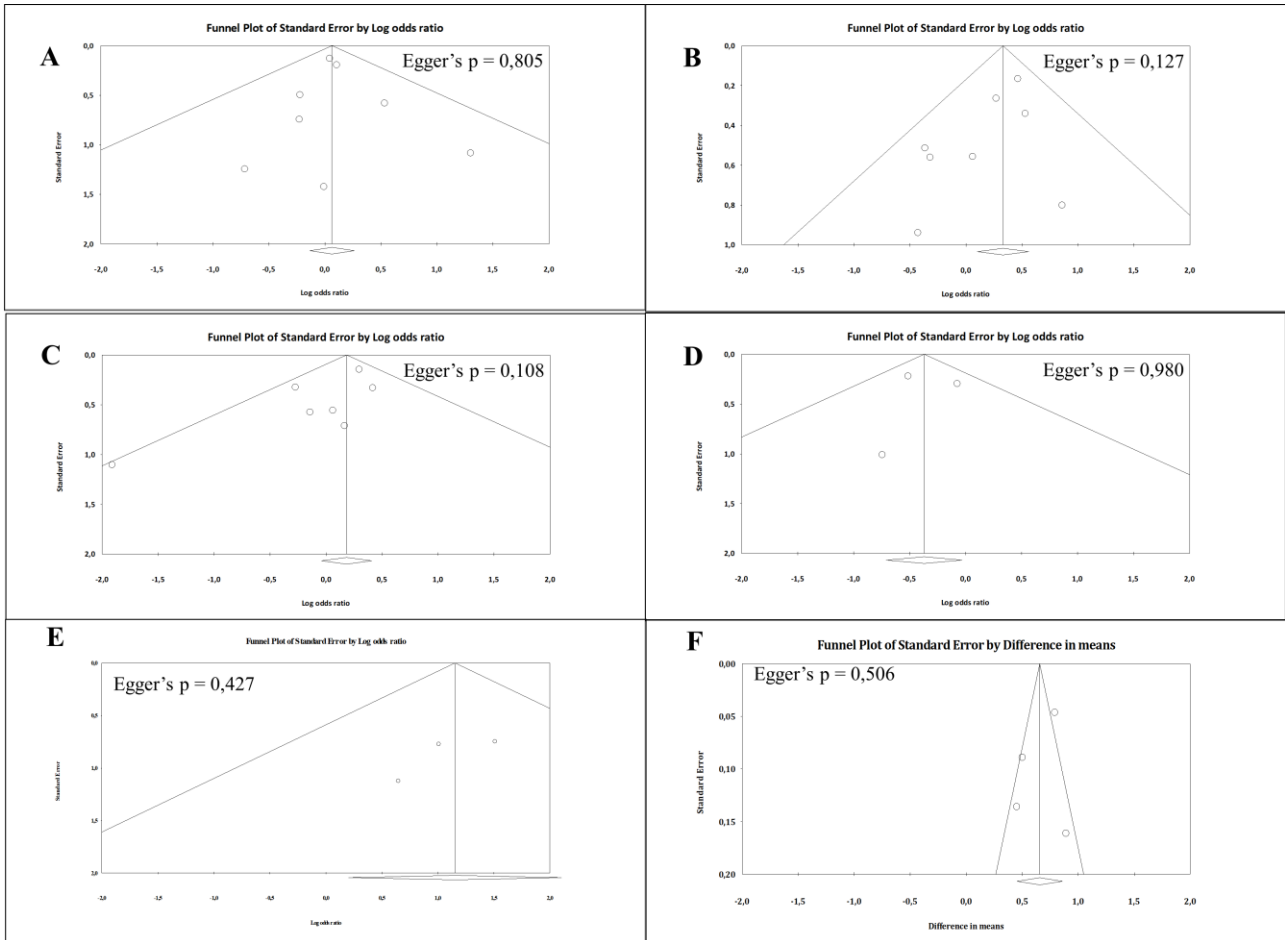

Supplement: JAH3-9-e016262-s001.pdf [file JAH3-9-e016262-s001.pdf]
